# Supplementary material for: COA6 Is Structurally Tuned to Function as a Thiol-Disulfide Oxidoreductase in Copper Delivery to Mitochondrial Cytochrome c Oxidase
Source: PubMed Central journal article supplement — Cell Rep. Author manuscript; Available in PMC 2020 Jan 7. (PMC6946597; doi:10.1016/j.celrep.2019.11.054), 2019-12-17
Supplement: NIHMS1547110-supplement-1.pdf [file NIHMS1547110-supplement-1.pdf]

## Supplemental Information

### **COA6 Is Structurally Tuned to Function as a Thiol-Disulfide Oxidoreductase in Copper Delivery to Mitochondrial Cytochrome c Oxidase**

**Shivatheja Soma, Marcos N. Morgada, Mandar T. Naik, Aren Boulet, Anna A. Roesler, Nathaniel Dziuba, Alok Ghosh, Qinhong Yu, Paul A. Lindahl, James B. Ames, Scot C. Leary, Alejandro J. Vila, and Vishal M. Gohil**

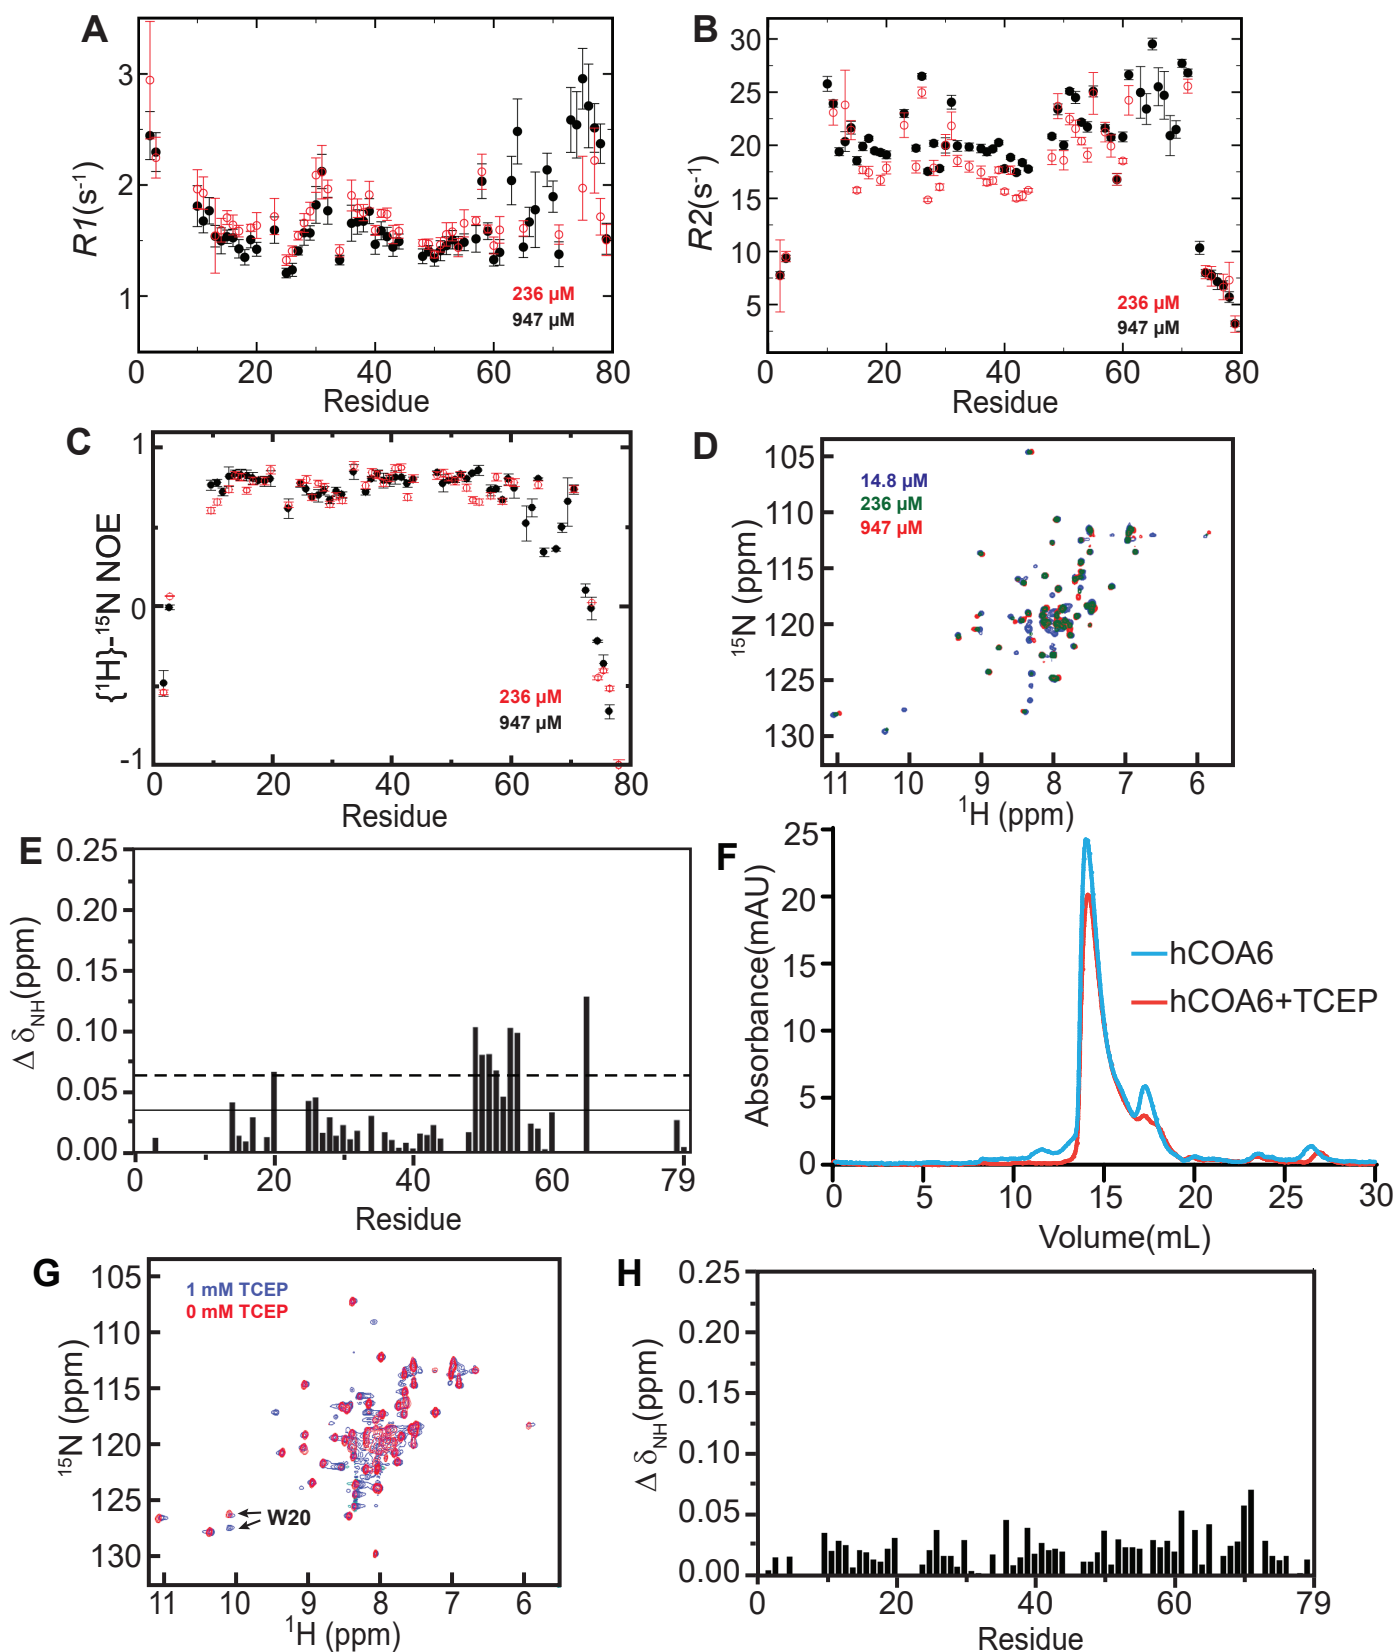

**Figure S1 (related to Figure 1). Interrogation of COA6 structure by NMR.**

(A) Longitudinal relaxation rates ( $R_1$ ), (B) transverse relaxation rates ( $R_2$ ), and (C) Heteronuclear  $^1\text{H}$ - $^{15}\text{N}$  NOEs, are plotted as a function of residue number for COA6 at two different protein concentrations. (D) Overlay of the  $^1\text{H}$ - $^{15}\text{N}$  HSQC spectra of human COA6 at three different protein concentrations: 14.8  $\mu\text{M}$  (blue), 236  $\mu\text{M}$  (green) and 947  $\mu\text{M}$  (red). (E) Average chemical shift deviation of  $^{15}\text{N}$ -labeled COA6 at 947  $\mu\text{M}$  TCEP when compared to treatment with 14.8  $\mu\text{M}$  TCEP. The horizontal solid line represents the mean and the dashed line represents the mean + SD of chemical shift perturbation for all residues. (F) Elution profile of COA6 from a Superdex 75 gel filtration column in the presence and absence of 1 mM TCEP. (G) Overlay of the  $^1\text{H}$ - $^{15}\text{N}$  HSQC spectra of human COA6 with and without 1 mM TCEP. (H) Average chemical shift deviation of  $^{15}\text{N}$ -labeled COA6 upon addition of 1 mM TCEP.

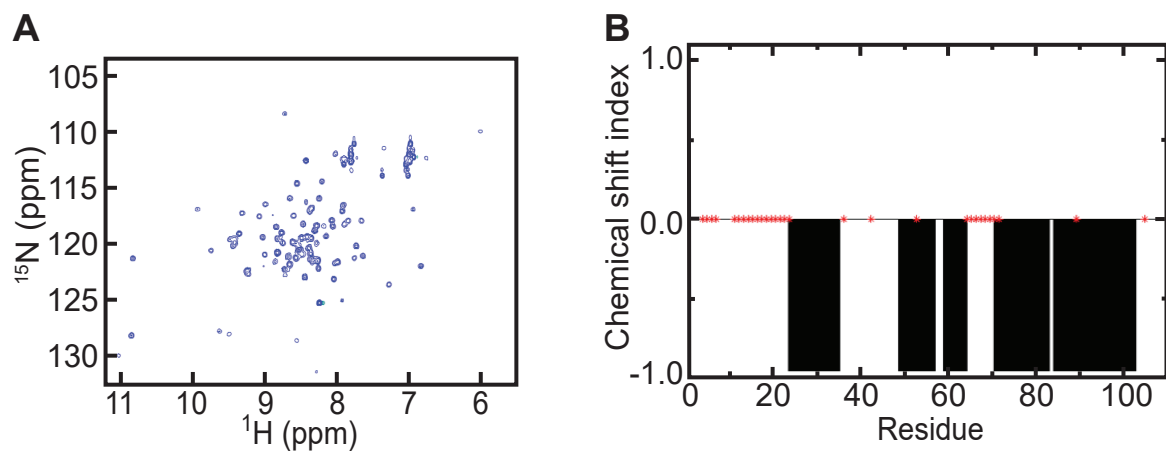

**Figure S2 (related to Figure 1). Yeast Coa6 is a helical protein.**

(A)  $^1\text{H}$ - $^{15}\text{N}$  HSQC spectrum of yeast Coa6. (B) The chemical shift index is shown as a function of residue number. Negative values represent an  $\alpha$ -helical propensity, while positive values are indicative of a  $\beta$ -strand. A red asterisk denotes residues which were unassigned.

A

SCO1 SFTGKPLLGGPFSLTTHTGERKTDKDYLGQWLLIYFGFTHCPDVCP**E**ELEK**MI**QVVDEID 189  
SCO2 ---GSFTGQGDFHLLDHRGRARCKADFRGQWVLMYFGFTHCPDICPDELEKLVQVVRQLE 152  
\* . \* \* \* \* . : . \* : \*\*\* : \* : \*\*\*\*\* : \* : \* \* \* : \* \* \* : \* :  
SCO1 SITTLPDLTPLFISIDPER**D**TKEAIA**NY**VKEF**S**PKLV**GLT****G**TREE**VD**QVARAYRVYYSFG 349  
SCO2 AEPGLPPVQPVFITVDPERDDVEAMARYVQDFHPRLLGLTGSTKQVAQASHSYRVYYNAG 212  
: \* \* : \* : \* : : \* \* \* \* \* \* \* : \* : \* . \* : \* : \* \* \* : : \* \* . : : \* \* \* \* \* . \*  
SCO1 PK**DE**DEDYIVDHTIIM**Y**LIGPDGEFLDYFGQNKRKGEIAASIATHMRPYRKKS- 301  
SCO2 PKDEDQDYIVDHSIAIYLLNPDGLFTDYYGRSRSAEQISDSVRRHMAAFRSVLS 266  
\* \* \* \* \* : \* \* \* \* \* : \* : \* \* : \* \* \* \* \* : \* : \* : \* \* : \* .

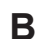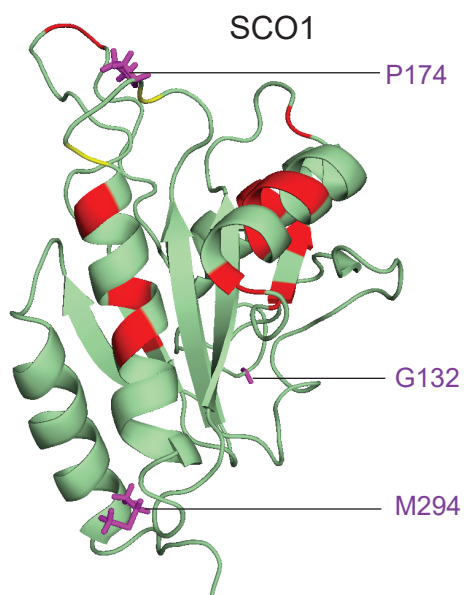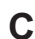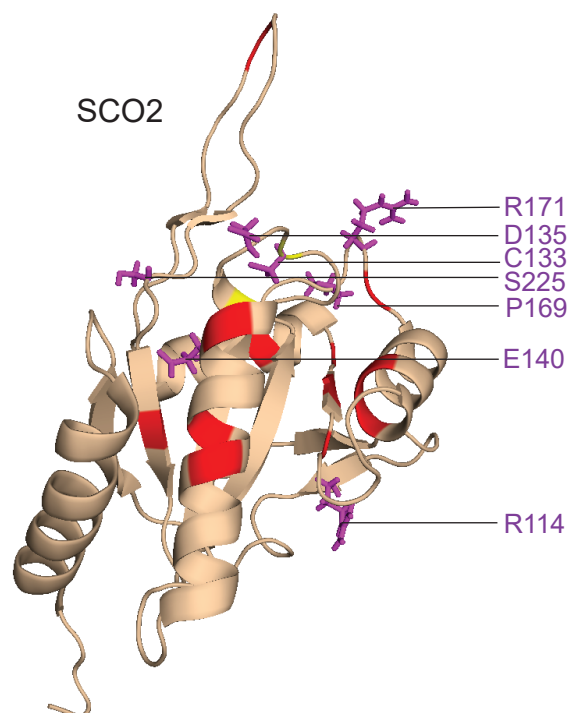

**Figure S3 (related to Figure 4). A subset of human patient mutations in SCO1 and SCO2 are in close vicinity to the COA6 interaction surface.**

A) Alignment of human SCO1 and SCO2 proteins. The amino acids shown in red undergo chemical shift perturbation in the presence of COA6, which is indicative of their involvement in an interaction. The residues shown in red and bold are the residues that are identical or similar in both SCO proteins. B) SCO1 (PDB: 2GVP) and SCO2 (PDB: 2RLI) amino acid residues that interact with COA6 are highlighted in red and side-chains of the residues mutated in human patients are depicted in purple. Patient mutations listed here are from OMIM database (OMIM:603644, OMIM:604272) and from Leary et al., 2013 and Rebelo et al., 2018.

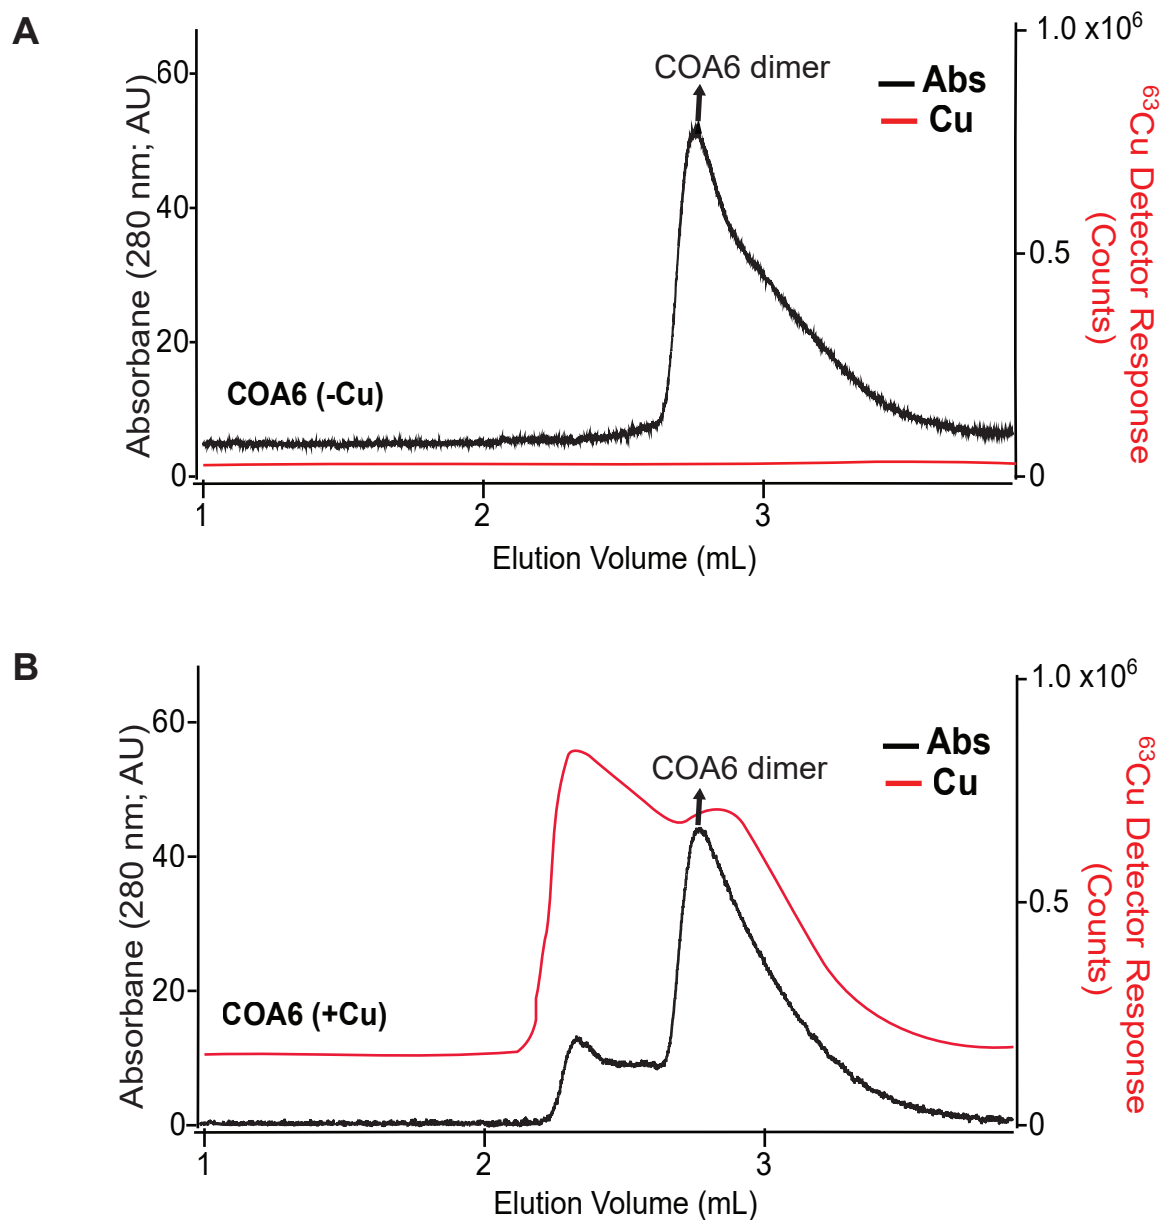

**Figure S4 (related to Figure 5). Recombinant COA6 only binds copper when reconstituted with the metal ion and reductant.**

(A)  $^{63}\text{Cu}$  and protein traces of recombinant COA6 analyzed by LC-ICP-MS. (B)  $^{63}\text{Cu}$  and protein traces of recombinant COA6 reconstituted with  $\text{CuSO}_4$  and reduced glutathione.

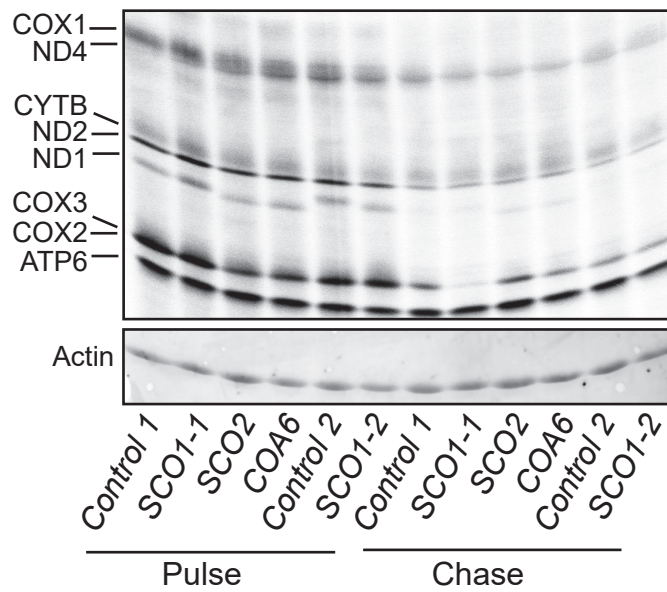

**Figure S5 (related to Figure 6). Impact of SCO1, SCO2 and COA6 mutations on the synthesis and turnover of COX2.**

*In vivo*  $^{35}\text{S}$ -labeling of mitochondrial translation products in control and patient cell lines. Samples were pulse-chased and analyzed by SDS-PAGE and digital autoradiography.

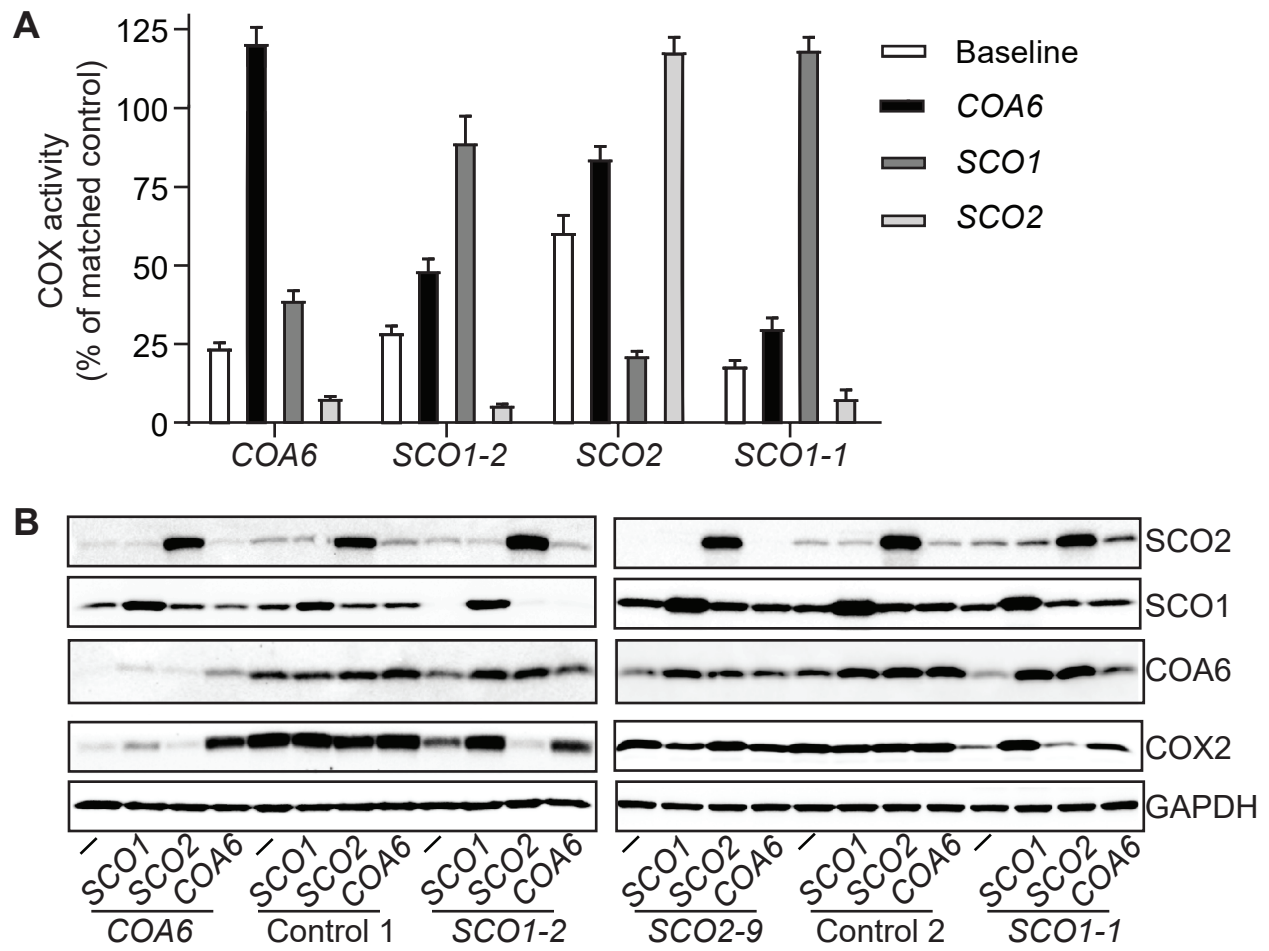

**Figure S6 (related to Figure 6). Epistasis analysis of SCO1, SCO2 and COA6 overexpression on CcO activity in patient cell lines.**

(A) Cytochrome c oxidase activity (CcO) in COA6, SCO1 and SCO2 patient cell lines alone (baseline) or when overexpressing COA6, SCO1 or SCO2. Data are represented as mean + SEM. (B) SDS-PAGE/Western blot analysis of COA6, SCO1, SCO2, COX2 and GAPDH (loading control) abundance in protein lysates from control and patient cells described in Figure A.

**Table S1 (related to Figure 1). NMR and refinement statistics for solution structure of COA6**

|                                              |                 |
|----------------------------------------------|-----------------|
| <b>NMR distance and dihedral constraints</b> |                 |
| Distance restraints                          |                 |
| Total NOE                                    | 554             |
| Intra-residue                                | 163             |
| Inter-residue                                | 284             |
| Sequential ( $ i - j  = 1$ )                 | 177             |
| Nonsequential ( $ i - j  > 1$ )              | 214             |
| Long-Range NOE                               | 107             |
| Hydrogen bonds                               | 32              |
| Total dihedral angle restraints              | 108             |
| $\phi$ (TALOS+)                              | 54              |
| $\psi$ (TALOS+)                              | 54              |
| <b>Structure statistics</b>                  |                 |
| Violations (mean and s.d.)                   |                 |
| Distance constraints (Å)                     | $0.01 \pm 0.03$ |
| Dihedral angle constraints ( $^\circ$ )      | $0.37 \pm 0.88$ |
| Max. dihedral angle violation ( $^\circ$ )   | 6.18            |
| Max. distance constraint violation (Å)       | 0.43            |
| Deviations from idealized geometry           |                 |
| Bond lengths (Å)                             | 0.008           |
| Bond angles ( $^\circ$ )                     | 0.6             |
| Ramachandran Plot                            |                 |
| Most favored                                 | 79.6%           |
| Additionally allowed                         | 17.2%           |
| Generously allowed                           | 3.2%            |
| Disallowed                                   | 0.1%            |
| Average pairwise r.m.s. deviation* (Å)       |                 |
| Protein structured region (residues 9 to 64) |                 |
| Heavy                                        | 1.35            |
| Backbone                                     | 0.54            |

\*Pairwise r.m.s. deviation was calculated among 20 refined structures.

**Table S2. Related to STAR Methods.** Primers used in this study.

| Name                                     | Sequence (5' to 3')                                              |
|------------------------------------------|------------------------------------------------------------------|
| <b>Protein expression primers</b>        |                                                                  |
| Human COA6 isoform 3 Forward             | GGGCCAGGATCCATGGCAGCACCGAGCATGAAA                                |
| Human COA6 isoform 3 Reverse             | GGGCCACTCGAGTTAGCTTTTTGCGGTGGTTC                                 |
| Yeast Coa6 Forward                       | TAGCGAAAATCTGTATTTTCAGGGTAGCGAATTCATGGGC<br>TTATTTTCATTGATGGTGCC |
| Yeast Coa6_Stop Reverse                  | GTGGTGGTGGTGGTGCTCGAGTCACTGATTTTCGTTCCCT<br>CTGTTTAG             |
| Yeast Coa6 Reverse                       | GTGGTGGTGGTGGTGCTCGAGCTGATTTTCGTTCCCTCTG<br>TTTAG                |
| <b>Site Directed mutagenesis primers</b> |                                                                  |
| <i>HyCOA6 W26C</i> Forward               | AGTATTCATCTCTAGCACCGCAACACAATTTTCTTTGGG                          |
| <i>HyCOA6 W26C</i> Reverse               | CCCCAAAGAAAATTGTGTTGCGGTGCTAGAGATGAATACT                         |
| <i>HyCOA6 W33R</i> Forward               | TTTTCGTCCAAACATTTCCGGTATTCATCTCTAGCACCC                          |
| <i>HyCOA6 W33R</i> Reverse               | GGGTGCTAGAGATGAATACCGGAAATGTTTGGACGAAAA                          |
| <i>HyCOA6 E54X</i> Forward               | CATTGTTGTGGACAAGAAGATTAGAAAGAGGATCTCAACT<br>TCTTA                |
| <i>HyCOA6 E54X</i> Reverse               | TAAGAAGTTGAGATCCTCTTTCTAATCTTCTTGTCCACAAC<br>AATG                |
| <b>Primers for Human COA6</b>            |                                                                  |
| COA6-F                                   | AAAAAGCAGGCTACCATGGGCCCGGGAGGTCCCTT                              |
| COA6-R                                   | AGAAAGCTGGGTCTAGGATTTTGCA GTTGTTTCTGA                            |
| COA6 W59C-F                              | GAAAGACAGGTCTGCTGTGGGGCCCGGGATGAGTAC                             |
| COA6 W59C-R                              | GTA CT CATCCC GGGCCCCACAGCAGACCTGTCTTTC                          |
| COA6 W66R-F                              | GCCCGGGATGAGTACCGGAAGTGTTTAGATG                                  |
| COA6 W66R-R                              | CATCTAAACACTTCCGGTACTCATCCCGGGC                                  |
| <b>Protein truncation primers</b>        |                                                                  |
| <i>HyCOA6</i> SacI Forward               | CCCCTGGAGCTCGCAAAGACGCGCAGCCAAAAA                                |
| <i>HyCOA6_64</i> BamH1 Reverse           | GCGCGCGGATCCCTTTTCTTTGAACTTCAAGTAGTCTCT                          |
| <i>HyCOA6_72</i> BamH1 Reverse           | GCGCGCGGATCCTGGTTCGAATTGACCGGCTTCGAACTT                          |
